# Supplementary material for: Remarquable heterogeneity in the genetic architecture of resistance to a key bacterial pathogen in commercial populations of rainbow trout
Source: Research Square preprint supplement (doi:10.21203/rs.3.rs-6591460/v1), 2025-07-15
Supplement: Supplementary file 1 [file 5a263d1e52869d6fb03b3174.xlsx]

## Sheet: Read_me
Column names
GWAS		Four GWAS were performed using various phenotypic datasets, as follows: the survival status at the end of the challenge (29 dpi) for each population A and B (GWAS ‘Pop. A’ and ‘Pop. B’), or with the two of them combined (GWAS ‘Comb. A+B’); the survival status at 10 dpi for population A (GWAS ‘Pop. A 10 dpi’).
Chr.		Name of the chromosome.
QTL position (min-max)		Start and end positions of each QTL are min and max values resulting from the 10 runs of each GWAS using different random seeds.
Ensembl Gene ID		Unique identifier assigned to a gene by the Ensembl database.
Start (bp)		Starting base pair position of the gene on the chromosome.
End (bp)		Ending base pair position of the gene on the chromosome.
Strand		Indicates the DNA strand on which the gene is located. It can either be the forward strand (denoted by "+") or the reverse strand (denoted by "-").
Gene type		Describes the functional category of the gene. Examples include "protein-coding" (genes that encode proteins) or "lncRNA" (long non-coding RNA).
HGNC		Standardized and approved symbol (or name) for the gene, as assigned by the HUGO Gene Nomenclature Committee.
Gene description		Description of the gene's function, role, or characteristics. This can include information about its involvement in biological processes.

## Sheet: Table S4_Genes_in_11_QTLs
Table S4. List of genes located in QTL regions.
GWAS	Chr.	QTL position (min-max)	Ensembl Gene ID	Start (bp)	End (bp)	Strand	Gene type	HGNC	Gene description
Pop. A	3	54.270712-54.862004	ENSOMYG00000015383	54234999	54363309	1	protein_coding	PTPN4	protein tyrosine phosphatase non-receptor type 4
			ENSOMYG00000015533	54366466	54435167	1	protein_coding	RAMP1	receptor activity modifying protein 1
			ENSOMYG00000053831	54471461	54473063	-1	protein_coding	GIN1	gypsy retrotransposon integrase 1
			ENSOMYG00000015542	54478478	54593926	-1	protein_coding	UBE2F	ubiquitin conjugating enzyme E2 F (putative)
			ENSOMYG00000061607	54497360	54498370	1	protein_coding	R3HDM1	R3H domain containing 1
			ENSOMYG00000015599	54617852	54656240	-1	protein_coding	METTL27	methyltransferase like 27
			ENSOMYG00000015651	54634083	54638219	-1	protein_coding	SLC6A6	solute carrier family 6 member 6
			ENSOMYG00000059937	54667997	54689505	1	protein_coding	CD22	CD22 molecule
			ENSOMYG00000015674	54859941	54927019	1	protein_coding	KLF7	Kruppel like factor 7
	17	32.575001-32.626696	ENSOMYG00000018801	32562351	32618405	-1	protein_coding	C3	complement C3
			ENSOMYG00000052703	32589369	32590376	1	protein_coding	R3HDM1	R3H domain containing 1
	29	32.952883-34.405456	ENSOMYG00000023326	32999525	33011232	1	protein_coding	CDC23	cell division cycle 23
			ENSOMYG00000023590	33011364	33018048	-1	protein_coding	KIF20A	kinesin family member 20A
			ENSOMYG00000023684	33019664	33036815	1	protein_coding	BRD8	bromodomain containing 8
			ENSOMYG00000023723	33042287	33057952	-1	protein_coding	DNAJB14	DnaJ heat shock protein family (Hsp40) member B14
			ENSOMYG00000023759	33068006	33191758	-1	protein_coding	PPP3CA	protein phosphatase 3 catalytic subunit alpha
			ENSOMYG00000067480	33083252	33084262	1	protein_coding	SETMAR	SET domain and mariner transposase fusion gene
			ENSOMYG00000070735	33114037	33115124	1	protein_coding	SRRM5	serine/arginine repetitive matrix 5
			ENSOMYG00000023934	33196443	33203872	1	protein_coding	UBE2D2	ubiquitin conjugating enzyme E2 D2
			ENSOMYG00000067301	33212881	33234153	1	lncRNA
			ENSOMYG00000057062	33330016	33331113	1	lncRNA
			ENSOMYG00000052381	33373523	33389262	-1	protein_coding	SH2D4B	SH2 domain containing 4B
			ENSOMYG00000077241	33428708	33429565	-1	protein_coding	PURA	purine rich element binding protein A
			ENSOMYG00000025227	33437279	33593490	1	protein_coding	NRG2	neuregulin 2
			ENSOMYG00000050364	33544258	33548317	-1	protein_coding	FAM186A	family with sequence similarity 186 member A
			ENSOMYG00000063212	33605538	33606614	1	protein_coding	TRPM3	transient receptor potential cation channel subfamily M member 3
			ENSOMYG00000025820	33612726	33613886	1	protein_coding	EPDR1	ependymin related 1
			ENSOMYG00000053845	33616262	33617387	-1	protein_coding	COX8A	cytochrome c oxidase subunit 8A
			ENSOMYG00000025891	33620323	33626488	-1	protein_coding	TRPM3	solute carrier family 22 member 6
			ENSOMYG00000026264	33639423	33651027	-1	protein_coding	PYGM	glycogen phosphorylase, muscle associated
			ENSOMYG00000059402	33658567	33660270	-1	protein_coding	DDX59	DEAD-box helicase 59
			ENSOMYG00000028008	33662360	33670810	1	protein_coding	RASGRP2	RAS guanyl releasing protein 2
			ENSOMYG00000076771	33678872	33683263	-1	lncRNA
			ENSOMYG00000028233	33740264	34087739	1	protein_coding	NRXN2	neurexin 2
			ENSOMYG00000068563	34089991	34091349	1	lncRNA
			ENSOMYG00000028756	34107817	34132125	1	protein_coding	PCNX1	pecanex 1
			ENSOMYG00000029511	34145173	34154958	1	protein_coding	CFB	complement factor B
			ENSOMYG00000029975	34156479	34163515	1	protein_coding	BBS1	Bardet-Biedl syndrome 1
			ENSOMYG00000032016	34164370	34171690	-1	protein_coding	CAPN1	calpain 1
			ENSOMYG00000040229	34178439	34194870	1	protein_coding	PACS1	phosphofurin acidic cluster sorting protein 1
			ENSOMYG00000040313	34223264	34226099	-1	protein_coding	RBM14	RNA binding motif protein 14
			ENSOMYG00000040326	34228675	34235409	1	protein_coding	RIN1	Ras and Rab interactor 1
			ENSOMYG00000040545	34235404	34246639	-1	protein_coding	DPP3	dipeptidyl peptidase 3
			ENSOMYG00000041463	34257113	34290548	1	protein_coding	SLC9A6	solute carrier family 9 member A6
			ENSOMYG00000041376	34257816	34268485	-1	protein_coding	IL2RG	interleukin 2 receptor subunit gamma
			ENSOMYG00000041803	34299888	34303333	1	protein_coding	FHL1	four and a half LIM domains 1
			ENSOMYG00000041811	34318124	34321603	1	protein_coding	ADGRG2	adhesion G protein-coupled receptor G2
			ENSOMYG00000041819	34328935	34335737	1	protein_coding	OPN3	opsin 3
			ENSOMYG00000041821	34341166	34342200	-1	protein_coding	ZIC3	Zic family member 3
			ENSOMYG00000036820	34364283	34371332	-1	protein_coding	FGF13	fibroblast growth factor 13
			ENSOMYG00000069284	34390482	34392206	1	protein_coding	GTF2IRD2B	GTF2I repeat domain containing 2B
Pop. B	1	24.572341-25.3825	ENSOMYG00000030095	24567221	24580988	1	protein_coding	ANLN	anillin actin binding protein
			ENSOMYG00000030121	24584123	24591470	1	protein_coding	EXOC3	exocyst complex component 3
			ENSOMYG00000030292	24591168	24596170	1	protein_coding	PRMT7	protein arginine methyltransferase 7
			ENSOMYG00000030376	24596085	24602378	-1	protein_coding	CIAPIN1	cytokine induced apoptosis inhibitor 1
			ENSOMYG00000030469	24603337	24610212	1	protein_coding	COQ9	coenzyme Q9
			ENSOMYG00000066207	24610445	24615711	1	protein_coding	POLR2C	RNA polymerase II subunit C
			ENSOMYG00000030798	24637524	24667460	1	protein_coding	WWP2	WW domain containing E3 ubiquitin protein ligase 2
			ENSOMYG00000031467	24662540	24662608	1	miRNA		microRNA 140
			ENSOMYG00000066139	24670240	24670711	1	protein_coding	ADAT1	adenosine deaminase tRNA specific 1
			ENSOMYG00000031489	24697687	24711462	-1	protein_coding	GABARAPL2	GABA type A receptor associated protein like 2
			ENSOMYG00000061779	24702319	24704430	1	protein_coding	CPT2	carnitine palmitoyltransferase 2
			ENSOMYG00000031503	24712459	24716073	1	protein_coding	TMEM231	transmembrane protein 231
			ENSOMYG00000072814	24745970	24747166	1	protein_coding	CHST6	carbohydrate sulfotransferase 6
			ENSOMYG00000031513	24752939	24783690	1	protein_coding	SPIRE2	spire type actin nucleation factor 2
			ENSOMYG00000031545	24785179	24794570	1	protein_coding	SNTB2	syntrophin beta 2
			ENSOMYG00000031745	24796158	24806028	1	protein_coding	VPS4A	vacuolar protein sorting 4 homolog A
			ENSOMYG00000032617	24808303	24819048	-1	protein_coding	CDK10	cyclin dependent kinase 10
			ENSOMYG00000033856	24826015	24831402	1	protein_coding	CHMP1A	charged multivesicular body protein 1A
			ENSOMYG00000033885	24837465	24838865	1	protein_coding	SLC10A3	solute carrier family 10 member 3
			ENSOMYG00000033892	24853830	24864808	-1	protein_coding	ZNF276	zinc finger protein 276
			ENSOMYG00000033913	24864829	24893331	1	protein_coding	VPS9D1	VPS9 domain containing 1
			ENSOMYG00000033970	24899545	24905567	-1	protein_coding	PECR	peroxisomal trans-2-enoyl-CoA reductase
			ENSOMYG00000033981	24907097	24910485	1	protein_coding	SPATA2L	spermatogenesis associated 2 like
			ENSOMYG00000034003	24911541	24912430	-1	protein_coding	PDF	peptide deformylase, mitochondrial
			ENSOMYG00000034038	24916116	24917170	1	protein_coding	TINF2	TERF1 interacting nuclear factor 2
			ENSOMYG00000034119	24925384	24938036	1	protein_coding	TAT	tyrosine aminotransferase
			ENSOMYG00000034660	24941705	24948946	1	protein_coding	AKR1B10	aldo-keto reductase family 1 member B10
			ENSOMYG00000034671	24949543	24953476	-1	pseudogene
			ENSOMYG00000060326	24961434	24964043	1	protein_coding	MIER1	MIER1 transcriptional regulator
			ENSOMYG00000034725	24966941	24971554	1	protein_coding	COTL1	coactosin like F-actin binding protein 1
			ENSOMYG00000034841	25025843	25040205	1	protein_coding	PLCG2	phospholipase C gamma 2
			ENSOMYG00000035732	25045217	25082591	-1	protein_coding	CMIP	c-Maf inducing protein
			ENSOMYG00000035909	25090277	25108649	-1	protein_coding	GAN	gigaxonin
			ENSOMYG00000035920	25136537	25137742	1	protein_coding	FOXL1	forkhead box L1
			ENSOMYG00000035940	25157096	25171313	-1	protein_coding	KIAA0513	KIAA0513
			ENSOMYG00000070951	25186176	25187829	1	protein_coding	B3GALT2	beta-1,3-galactosyltransferase 2
			ENSOMYG00000035972	25189176	25285949	1	protein_coding	ZFPM1	zinc finger protein, FOG family member 1
			ENSOMYG00000035991	25372523	25379566	-1	protein_coding	TRHR	thyrotropin releasing hormone receptor
	1	57.293434-58.069571	ENSOMYG00000000280	56905041	57496586	-1	protein_coding	CDH23	cadherin related 23
			ENSOMYG00000000362	57035816	57060069	1	protein_coding	VSIR	V-set immunoregulatory receptor
			ENSOMYG00000000378	57652955	57766236	1	protein_coding	PLPP4	phospholipid phosphatase 4
			ENSOMYG00000000509	57805809	57937578	1	protein_coding	WDR11	WD repeat domain 11
			ENSOMYG00000050718	57959055	57960068	-1	protein_coding	WDR81	WD repeat domain 81
	1	58.80904-59.411582	ENSOMYG00000002550	58807615	58835068	1	protein_coding	FAM160B1	family with sequence similarity 160 member B1
			ENSOMYG00000002699	58840726	58913844	-1	protein_coding	SRF	serum response factor
			ENSOMYG00000074296	58877847	58880075	1	protein_coding
			ENSOMYG00000003783	58926097	59134703	-1	protein_coding	PTK7	protein tyrosine kinase 7 (inactive)
			ENSOMYG00000005197	59144371	59182452	-1	protein_coding	KLC1	kinesin light chain 1
			ENSOMYG00000006884	59213111	59249279	-1	protein_coding	ADK	adenosine kinase
			ENSOMYG00000067604	59276577	59279588	1	protein_coding	RTL1	retrotransposon Gag like 1
			ENSOMYG00000008588	59293011	59297381	1	protein_coding	ERLIN1	ER lipid raft associated 1
			ENSOMYG00000072443	59310298	59318097	-1	protein_coding	SPEF1	sperm flagellar 1
			ENSOMYG00000009013	59342526	59348128	-1	protein_coding	FUOM	fucose mutarotase
			ENSOMYG00000009130	59349813	59367884	-1	protein_coding	ECHS1	enoyl-CoA hydratase, short chain 1
			ENSOMYG00000009243	59379991	59398591	-1	protein_coding	MTG1	mitochondrial ribosome associated GTPase 1
			ENSOMYG00000009276	59406970	59422424	-1	protein_coding	PAOX	polyamine oxidase
	11	43.804699-44.070523	ENSOMYG00000007745	44030639	44032106	1	protein_coding	COX7C	cytochrome c oxidase subunit 7C
	12	30.649112-31.030327	ENSOMYG00000031435	30648668	30672027	-1	protein_coding	NUP98	nucleoporin 98 and 96 precursor
			ENSOMYG00000031708	30677731	30691277	1	protein_coding	SLC37A4	solute carrier family 37 member 4
			ENSOMYG00000031726	30700557	30702214	1	protein_coding	RPS25	ribosomal protein S25
			ENSOMYG00000031738	30718541	30728863	1	protein_coding	SGCG	sarcoglycan gamma
			ENSOMYG00000031749	30729124	30731695	1	protein_coding	TNFRSF19	TNF receptor superfamily member 19
			ENSOMYG00000066425	30735341	30736351	1	protein_coding	TRPM3	transient receptor potential cation channel subfamily M member 3
			ENSOMYG00000032136	30740358	30754989	-1	protein_coding	MIPEP	mitochondrial intermediate peptidase
			ENSOMYG00000034083	30774301	30788228	1	protein_coding	GET1	guided entry of tail-anchored proteins factor 1
			ENSOMYG00000040256	30785288	30786295	-1	protein_coding	SEL1L3	SEL1L family member 3
			ENSOMYG00000034102	30799925	30824188	1	protein_coding	IGSF5	immunoglobulin superfamily member 5
			ENSOMYG00000034112	30877081	30878102	1	protein_coding	PCP4	Purkinje cell protein 4
			ENSOMYG00000034298	30896020	31031000	-1	protein_coding	DSCAM	Down syndrome cell adhesion molecule
	24	22.267241-22.627181	ENSOMYG00000064869	22291150	22293273	1	protein_coding	RBM7	RNA binding motif protein 7
			ENSOMYG00000039343	22304828	22317049	1	protein_coding	BARX2	BARX homeobox 2
			ENSOMYG00000039450	22466201	22676215	-1	protein_coding	KIRREL3	kirre like nephrin family adhesion molecule 3
Comb. A+B	3	54.053907-54.685772	ENSOMYG00000013458	54052783	54146401	1	protein_coding	PTH2R	parathyroid hormone 2 receptor
			ENSOMYG00000067741	54179719	54180732	-1	protein_coding	SETMAR	SET domain and mariner transposase fusion gene
			ENSOMYG00000015337	54182516	54192045	-1	protein_coding	MRAS	muscle RAS oncogene homolog
			ENSOMYG00000074564	54199525	54200628	-1	protein_coding	RYR2	ryanodine receptor 2
			ENSOMYG00000015343	54209555	54210758	1	protein_coding	TMEM177	transmembrane protein 177
			ENSOMYG00000015383	54234999	54363309	1	protein_coding	PTPN4	protein tyrosine phosphatase non-receptor type 4
			ENSOMYG00000015533	54366466	54435167	1	protein_coding	RAMP1	receptor activity modifying protein 1
			ENSOMYG00000053831	54471461	54473063	-1	protein_coding	GIN1	gypsy retrotransposon integrase 1
			ENSOMYG00000015542	54478478	54593926	-1	protein_coding	UBE2F	ubiquitin conjugating enzyme E2 F (putative)
			ENSOMYG00000061607	54497360	54498370	1	protein_coding	R3HDM1	R3H domain containing 1
			ENSOMYG00000015599	54617852	54656240	-1	protein_coding	METTL27	methyltransferase like 27
			ENSOMYG00000015651	54634083	54638219	-1	protein_coding	SLC6A6	solute carrier family 6 member 6
			ENSOMYG00000059937	54667997	54689505	1	protein_coding	CD22	CD22 molecule
	17	32.123483-32.626696	ENSOMYG00000021484	32109014	32142180	1	protein_coding	MEIS1	Meis homeobox 1
			ENSOMYG00000021545	32170498	32174078	1	protein_coding	ETAA1	ETAA1 activator of ATR kinase
			ENSOMYG00000021603	32181941	32200014	-1	protein_coding	PPP3R1	protein phosphatase 3 regulatory subunit B, alpha
			ENSOMYG00000021755	32201577	32203193	-1	protein_coding	CNRIP1	cannabinoid receptor interacting protein 1
			ENSOMYG00000021763	32206254	32206926	-1	protein_coding	FBXO48	F-box protein 48
			ENSOMYG00000021766	32233707	32234232	-1	protein_coding	NLRP12	NLR family pyrin domain containing 12
			ENSOMYG00000021770	32253192	32263659	1	protein_coding	APLF	aprataxin and PNKP like factor
			ENSOMYG00000021783	32275182	32281254	-1	protein_coding	SNRPB2	small nuclear ribonucleoprotein polypeptide B2
			ENSOMYG00000021901	32283332	32310562	1	protein_coding	KIF16B	kinesin family member 16B
			ENSOMYG00000022012	32323556	32329449	-1	protein_coding	NDUFAF5	NADH:ubiquinone oxidoreductase complex assembly factor 5
			ENSOMYG00000022026	32331005	32339302	1	protein_coding	ESF1	ESF1 nucleolar pre-rRNA processing protein homolog
			ENSOMYG00000055198	32331030	32331776	1	protein_coding	ESF1	ESF1 nucleolar pre-rRNA processing protein homolog
			ENSOMYG00000017103	32340651	32343546	-1	protein_coding	BTBD3	BTB domain containing 3
			ENSOMYG00000017134	32353316	32376229	1	protein_coding	ERO1B	endoplasmic reticulum oxidoreductase 1 beta
			ENSOMYG00000059378	32361219	32362820	-1	protein_coding	TEX55	testis expressed 55
			ENSOMYG00000072093	32379621	32384076	-1	protein_coding	GPR137B	G protein-coupled receptor 137B
			ENSOMYG00000017160	32387079	32387959	-1	protein_coding	GPR137B	G protein-coupled receptor 137B
			ENSOMYG00000017170	32423254	32441804	1	protein_coding	PGBD4	piggyBac transposable element derived 4
			ENSOMYG00000017188	32449032	32477982	1	protein_coding	ZNF568	zinc finger protein 568
			ENSOMYG00000072472	32463684	32465162	-1	protein_coding	C2orf81	chromosome 2 open reading frame 81
			ENSOMYG00000017196	32485824	32491828	-1	protein_coding	CYP2J2	cytochrome P450 family 2 subfamily J member 2
			ENSOMYG00000017588	32498561	32559733	1	protein_coding	NID1	nidogen 1
			ENSOMYG00000076450	32522782	32527023	-1	protein_coding	PEG10	paternally expressed 10
			ENSOMYG00000018801	32562351	32618405	-1	protein_coding	C3	complement C3
			ENSOMYG00000052703	32589369	32590376	1	protein_coding	R3HDM1	R3H domain containing 1
	29	33.434218-34.453517	ENSOMYG00000025227	33437279	33593490	1	protein_coding	NRG2	neuregulin 2
			ENSOMYG00000050364	33544258	33548317	-1	protein_coding	FAM186A	family with sequence similarity 186 member A
			ENSOMYG00000063212	33605538	33606614	1	protein_coding	TRPM3	transient receptor potential cation channel subfamily M member 3
			ENSOMYG00000025820	33612726	33613886	1	protein_coding	EPDR1	ependymin related 1
			ENSOMYG00000053845	33616262	33617387	-1	protein_coding	COX8A	cytochrome c oxidase subunit 8A
			ENSOMYG00000025891	33620323	33626488	-1	protein_coding	SLC22A6	solute carrier family 22 member 6
			ENSOMYG00000026264	33639423	33651027	-1	protein_coding	PYGM	glycogen phosphorylase, muscle associated
			ENSOMYG00000059402	33658567	33660270	-1	protein_coding	DDX59	DEAD-box helicase 59
			ENSOMYG00000028008	33662360	33670810	1	protein_coding	RASGRP2	RAS guanyl releasing protein 2
			ENSOMYG00000076771	33678872	33683263	-1	lncRNA
			ENSOMYG00000028233	33740264	34087739	1	protein_coding	NRXN2	neurexin 2
			ENSOMYG00000068563	34089991	34091349	1	lncRNA
			ENSOMYG00000028756	34107817	34132125	1	protein_coding	PCNX1	pecanex 1
			ENSOMYG00000029511	34145173	34154958	1	protein_coding	CFB	complement factor B
			ENSOMYG00000029975	34156479	34163515	1	protein_coding	BBS1	Bardet-Biedl syndrome 1
			ENSOMYG00000032016	34164370	34171690	-1	protein_coding	CAPN1	calpain 1
			ENSOMYG00000040229	34178439	34194870	1	protein_coding	PACS1	phosphofurin acidic cluster sorting protein 1
			ENSOMYG00000040313	34223264	34226099	-1	protein_coding	RBM14	RNA binding motif protein 14
			ENSOMYG00000040326	34228675	34235409	1	protein_coding	RIN1	Ras and Rab interactor 1
			ENSOMYG00000040545	34235404	34246639	-1	protein_coding	DPP3	dipeptidyl peptidase 3
			ENSOMYG00000041463	34257113	34290548	1	protein_coding	SLC9A6	solute carrier family 9 member A6
			ENSOMYG00000041376	34257816	34268485	-1	protein_coding	IL2RG	interleukin 2 receptor subunit gamma
			ENSOMYG00000041803	34299888	34303333	1	protein_coding	FHL1	four and a half LIM domains 1
			ENSOMYG00000041811	34318124	34321603	1	protein_coding	ADGRG2	adhesion G protein-coupled receptor G2
			ENSOMYG00000041819	34328935	34335737	1	protein_coding	OPN3	opsin 3
			ENSOMYG00000041821	34341166	34342200	-1	protein_coding	ZIC3	Zic family member 3
			ENSOMYG00000036820	34364283	34371332	-1	protein_coding	FGF13	fibroblast growth factor 13
			ENSOMYG00000069284	34390482	34392206	1	protein_coding	GTF2IRD2B	GTF2I repeat domain containing 2B
			ENSOMYG00000041902	34447370	34455242	1	protein_coding	ARR3	arrestin 3
	31	24.852072-25.233141	ENSOMYG00000021261	24853009	24854853	1	protein_coding	ADRA2A	adrenoceptor alpha 2A
			ENSOMYG00000074660	24954102	24955643	-1	protein_coding	POLR2A	RNA polymerase II subunit A
			ENSOMYG00000021280	24956100	24979606	-1	protein_coding	SLC34A1	solute carrier family 34 member 1
			ENSOMYG00000021341	24986487	25002947	-1	protein_coding	RGS14	regulator of G protein signaling 14
			ENSOMYG00000021378	25019239	25020604	-1	protein_coding	PFN3	profilin 3
			ENSOMYG00000070697	25066380	25080228	1	protein_coding	MYOZ2	myozenin 2
			ENSOMYG00000021529	25095857	25180734	1	protein_coding	NDST1	N-deacetylase and N-sulfotransferase 1
			ENSOMYG00000021756	25183222	25191476	1	protein_coding	CD74	CD74 molecule
			ENSOMYG00000077751	25200885	25201840	-1	protein_coding	SLC35A4	solute carrier family 35 member A4
			ENSOMYG00000068297	25204514	25215379	1	protein_coding	HMGXB3	HMG-box containing 3
			ENSOMYG00000022329	25217367	25244234	-1	protein_coding	CSF1R	colony stimulating factor 1 receptor
Pop. A (10dpi)	3	53.465989-53.98674	ENSOMYG00000006168	53540036	53562260	-1	protein_coding	RND3	Rho family GTPase 3
			ENSOMYG00000006220	53626568	53630582	1	protein_coding	SIGLEC14	sialic acid binding Ig like lectin 14
			ENSOMYG00000006412	53632337	53646222	1	protein_coding	PARP14	poly(ADP-ribose) polymerase family member 14
			ENSOMYG00000006585	53654333	53664044	-1	protein_coding	UBXN4	UBX domain protein 4
			ENSOMYG00000006736	53672478	53698908	-1	protein_coding	R3HDM1	R3H domain containing 1
			ENSOMYG00000006753	53682063	53682118	-1	miRNA		microRNA 128-1
			ENSOMYG00000010724	53818302	53864914	-1	protein_coding	RAB3GAP1	RAB3 GTPase activating protein catalytic subunit 1
			ENSOMYG00000013082	53865769	53869363	1	protein_coding	FASTKD3	FAST kinase domains 3
			ENSOMYG00000058016	53874926	53879796	1	lncRNA
			ENSOMYG00000013100	53879817	53881919	1	lncRNA
			ENSOMYG00000013106	53882025	53883433	1	protein_coding	MAP3K19	mitogen-activated protein kinase kinase kinase 19
			ENSOMYG00000013118	53885353	53893865	-1	protein_coding	CCNT2	cyclin T2
			ENSOMYG00000013166	53904022	53990810	1	protein_coding	TMEM163	transmembrane protein 163
