# Supplementary material for: Remarquable heterogeneity in the genetic architecture of resistance to a key bacterial pathogen in commercial populations of rainbow trout
Source: Research Square preprint supplement (doi:10.21203/rs.3.rs-6591460/v1), 2025-07-15
Supplement: Supplementary file 3 [file 75ad3c2fbf7f4c7ccd44ae83.xlsx]

## Sheet: Read_me
Column names
Reference		Short reference with first author name and date of the publication.
Journal Name		Journal where the article was published.
Population		Rainbow trout population studied.
Type of Marker		Type of molecular markers used for the genetic analysis. This column specifies the nature of the markers applied in the study, such as Single Nucleotide Polymorphisms ("SNPs"), Short Tandem Repeats ("STRs"), or Restriction site Associated DNA markers ("RADs").
Methods of Analysis		Method of genetic analysis used in the study. This column specifies whether the study performed QTL analysis, GWAS (Genome-Wide Association Study), linkage analysis, or other statistical approaches to detect genetic associations.
Software		Software used for the QTL analysis. This column indicates the name of the software or combination of software packages employed to perform the QTL detection, analysis, and related statistical computations.
BCWD Phenotype		Can be the survival status ("STATUS"), the time to death ("DAYS") or the presence of a lesion at the injection site ("Disease lesion").
Genetic map (cM)		Include the chromosome ("Omy"), the positions of the QTL ("Start" and "End") in centiMorgan and the flanking markers ID ("Start-marker" and "End-marker").
Physical map (bp) on Swanson genome assembly		Include the chromosome ("Omy"), the positions of the QTL ("Start" and "End") and the flanking markers ID ("Start-marker" and "End-marker") on the Swanson genome assembly.
Physical map (bp) on Arlee genome assembly		Include the chrosomone ("Omy") and the positions of the QTL ("Start" and "End") on the Arlee genome assembly.

## Sheet: Table S5_List_QTLs_BCWD
Table S5: List of QTLs for BCWD resistance in rainbow trout populations reported in previous studies and in this study.												Physical map (bp) on Swanson genome assembly					Physical map (bp) on Arlee genome assembly
Reference	Journal Name	Population	Type of Marker	Method of Analysis	Software	BCWD Phenotype	Genetic map (cM)					Omy	Start	End	Start-marker	End-marker	Omy	Start	End	Comments
							Omy	Start	End	Start-marker	End-marker
This study (FLAVOCONTROL)		Pop.B	SNPs	QTL analysis & GWAS		STATUS						1	21270442	22061729			1	24572341	25382500	Omy1_24.646
This study (FLAVOCONTROL)		Pop.B	SNPs	QTL analysis & GWAS		STATUS						1	53403092	54168478			1	57293434	58069571	Omy1_58.069
This study (FLAVOCONTROL)		Pop.B	SNPs	QTL analysis & GWAS		STATUS						1	54921636	55516631			1	58809040	59411582	Omy1_59.302
Vallejo et al., 2014	Marine Biotechnology	NCCCWA, YC 2005, 2007, 2009	STRs	Linkage analysis	GridQTL	DAYS	1	33		OMM1082	OMM5288	1	67448285	69461069	OMM1082	OMM5288
Palti et al., 2015	PlosOne	NCCCWA, YC 2009	RADs, STRs	QTL analysis & GWAS	GridQTL & GenAbel	DAYS	1	83		RM20090706108	RM20090701492	1	70378924	71955887	RM20090706108	RM20090701492	1		75990245
Fraslin et al., 2018	GSE	INRA doubled haploid F2 (RxS)	RADs	QTL analysis & GWAS								2	3023488	21986032						Omy2
Vallejo et al., 2014	Marine Biotechnology	NCCCWA, YC 2005, 2007, 2009	STRs	Linkage analysis	GridQTL	DAYS & STATUS	2	4		OMM1131	OMM1603	2	3191009	42244523	OMM1131	OMM1603
Fraslin et al., 2018	GSE	INRA doubled haploid F2 (RxS)	RADs	QTL analysis & GWAS								2	3491389	20146305						Omy2
Liu et al., 2015	Frontiers in Genetics	NCCCWA, YC 2012	RADs	QTL analysis & GWAS	GridQTL & GenAbel	DAYS & STATUS	2	20		RTRAD89NT135931	RTRAD89NT118565	2	20000000		NA	NA				Dam HS family
Vallejo et al., 2014	Marine Biotechnology	NCCCWA, YC 2005, 2007, 2009	STRs	Linkage analysis	GridQTL	DAYS & STATUS	2	41	42	OMM5198	OMM1228	2	55783552	78687386	OMM5198	OMM1228
Vallejo et al., 2014	Marine Biotechnology	NCCCWA, YC 2005, 2007, 2009	STRs	Linkage analysis	GridQTL	DAYS & STATUS	3	66	73	OMM1016a	OMM5324	3	3944231	53789568	OMM1016a	OMM5324
Wiens et al., 2013	PlosOne	NCCCWA, YC 2007, 2008	STRs	Linkage analysis	GridQTL	STATUS	3	9		OMM1016a	OMM5121	3	3944231	17269491	OMM1016a	OMM5121
Vallejo et al., 2014	Marine Biotechnology	NCCCWA, YC 2005, 2007, 2009	STRs	Linkage analysis	GridQTL	DAYS	3	5		OMM5204	OMM1391a	3	4907259	50276782	OMM5204	OMM1391a
Vallejo et al., 2017	Frontiers in Genetics	Troutlodge, Inc., YC 2013	SNPs	wssGBLUP	BLUPF90	STATUS	3					3	17812341	18600963	Affx-88909970	Affx-88904917	3	13986654	14787923
Fraslin et al., 2018	GSE	INRA doubled haploid F2 (RxS)	RADs	QTL analysis & GWAS								3	34499584	79440047						Omy3Omy29
Fraslin et al., 2018	GSE	INRA doubled haploid F2 (RxS)	RADs	QTL analysis & GWAS								3	50145203	64170538						Omy3
Fraslin et al., 2018	GSE	INRA doubled haploid F2 (RxS)	RADs	QTL analysis & GWAS								3	51072868	63204387						Omy3
Fraslin et al., 2018	GSE	INRA doubled haploid F2 (RxS)	RADs	QTL analysis & GWAS								3	54412439	62210559						Omy3
Fraslin et al., 2018	GSE	INRA doubled haploid F2 (RxS)	RADs	QTL analysis & GWAS								3	54412439	62210559						Omy3Omy2
Fraslin et al., 2018	GSE	INRA doubled haploid F2 (RxS)	RADs	QTL analysis & GWAS								3	54412439	62012358						Omy3Omy21
Vallejo et al., 2017	Frontiers in Genetics	NCCCWA, YC 2005	SNPs	BayesB	GENSEL	STATUS	3					3	55025670	55964831	Affx-88917670	Affx-88935875	3	51872547	52781125
Vallejo et al., 2017	Frontiers in Genetics	NCCCWA, YC 2005	RAD-SNPs	BayesB	GENSEL	STATUS	3					3	55254048	55993431	BCWD10F04977	BCWD10F00765
Fraslin et al., 2018	GSE	INRA doubled haploid F2 (RxS)	RADs	QTL analysis & GWAS								3	56178086	62210559						Omy3
Fraslin et al., 2018	GSE	INRA doubled haploid F2 (RxS)	RADs	QTL analysis & GWAS								3	56465150	60833704						Omy3Omy25a
This study (FLAVOCONTROL)		Pop.A	SNPs	QTL analysis & GWAS		STATUS						3	56649426	57175942			3	53465989	53986740	Omy3_53.505
Vallejo et al., 2022	Aquaculture	Troutlodge, Inc., YC 2015	SNPs	ssBMR-BayesB								3	57059195	57791465	Affx-88960392	Affx-88959279				QTL 3.1
Vallejo et al., 2022	Aquaculture	Troutlodge, Inc., YC 2015	SNPs	wssGBLUP								3	57059195	58015058	Affx-88960392	Affx-88938003				QTL 3.1
Vallejo et al., 2022	Aquaculture	Troutlodge, Inc., YC 2016	SNPs	ssBMR-BayesB								3	57059195	57335838	Affx-88960392	Affx-88918742				QTL 3.1
This study (FLAVOCONTROL)		Pop. A + B	SNPs	QTL analysis & GWAS		STATUS						3	57242774	57879997			3	54053907	54685772	Omy3_54.387
This study (FLAVOCONTROL)		Pop.A	SNPs	QTL analysis & GWAS		STATUS						3	57461816	58052717			3	54270712	54862004	Omy3_54.387
Vallejo et al., 2017	Frontiers in Genetics	Troutlodge, Inc., YC 2013	SNPs	wssGBLUP	BLUPF90	STATUS	3					3	61621949	62558467	Affx-88925949	Affx-88919479	3	58437418	59360887	QTL 3.2
Fraslin et al., 2019	Animal Genetics	Les Aquaculteurs Bretons	SNPs	wssGBLUP	BLUPF90	DAYS	3					3	64970000		AX-89967826
Vallejo et al., 2017	Frontiers in Genetics	Troutlodge, Inc., YC 2013	SNPs	wssGBLUP	BLUPF90	STATUS	3					3	77108538	78076592	Affx-88925305	Affx-88929879	3	75564234	75963639	QTL 3.3
Quillet et al., 2014	Proceedings 10th WCGALP	doubled haploid F2 (RxS)	STRs, SNPs	QTL analysis	QTLMAP	STATUS	3	Na		Na		3			NA	NA
Campbell et al., 2014	G3	Clear Springs Foods Inc.	RADs	GWAS	TASSEL	STATUS	4	Na		R20199		4	53443152	53443218	R20199
Vallejo et al., 2014	Marine Biotechnology	NCCCWA, YC 2005, 2007, 2009	STRs	Linkage analysis	GridQTL	DAYS & STATUS	8	5	6	CR371139	OMM1069	4	81642785		CR371139	NA
Campbell et al., 2014	G3	Clear Springs Foods Inc.	RADs	GWAS	TASSEL	STATUS	4	Na		R49259		4	83955234	83955300	R49259
Vallejo et al., 2014	Marine Biotechnology	NCCCWA, YC 2005, 2007, 2009	STRs	Linkage analysis	GridQTL	DAYS & STATUS	5	0	21	OMM1075	OMM1636	5	2011780	5559384	OMM1075	OMM1636				This QTL is ~6Mb far from QTL 5.1, both must be the same QTL
Vallejo et al., 2017	Frontiers in Genetics	NCCCWA, YC 2005	SNPs	wssGBLUP	BLUPF90	STATUS	5					5	11245430	12244569	Affx-88930371	Affx-88921454	5	13900537	14915881
Vallejo et al., 2017	Frontiers in Genetics	Troutlodge, Inc., YC 2013	SNPs	wssGBLUP	BLUPF90	STATUS	5					5	11339155	12329117	Affx-88916119	Affx-88936955	5	13995537	14996663
Vallejo et al., 2017	Frontiers in Genetics	NCCCWA, YC 2005	RAD-SNPs	wssGBLUP	BLUPF90	STATUS	5					5	11966155	12948479	BCWD10F15578	BCWD10F00357
Vallejo et al., 2017	Frontiers in Genetics	NCCCWA, YC 2005	RAD-SNPs	BayesB	GENSEL	STATUS	5					5	41094726	41686801	BCWD10F02753	BCWD10F18861	5		45052108
Vallejo et al., 2014	Marine Biotechnology	NCCCWA, YC 2005, 2007, 2009	STRs	Linkage analysis	GridQTL	DAYS	5	77		OMM1660	OMM5025	5	87325637		NA	OMM5025
Vallejo et al., 2014	Marine Biotechnology	NCCCWA, YC 2005, 2007, 2009	STRs	Linkage analysis	GridQTL	DAYS & STATUS	6	5		OMM5306	OMM5254	6	4355841	15516680	OMM5306	OMM5254
Campbell et al., 2014	G3	Clear Springs Foods Inc.	RADs	GWAS	TASSEL	STATUS	6	Na		R34531		6	6331717	6331783	R34531
Fraslin et al., 2018	GSE	INRA doubled haploid F2 (RxS)	RADs	QTL analysis & GWAS								7	5696080	70487960						Omy7.2Omy21
Palti et al., 2015	PlosOne	NCCCWA, YC 2009	RADs, STRs	QTL analysis & GWAS	GridQTL & GenAbel	STATUS	7	54		RM20090702856	RM20090700328	7	15368940	15991566	RM20090702856	RM20090700328	7	21496027	22155649
Fraslin et al., 2018	GSE	INRA doubled haploid F2 (RxS)	RADs	QTL analysis & GWAS								7	15686817	50989615						Omy7.1Omy2
Palti et al., 2015	PlosOne	NCCCWA, YC 2009	RADs, STRs	QTL analysis & GWAS	GridQTL & GenAbel	DAYS & STATUS	6	23		RM20090700212	RM20090701885	7	17341484		NA	RM20090701885
Fraslin et al., 2019	Animal Genetics	Les Aquaculteurs Bretons	SNPs	wssGBLUP	BLUPF90	DAYS	7					7	19340000		AX-89937283
Vallejo et al., 2014	Marine Biotechnology	NCCCWA, YC 2005, 2007, 2009	STRs	Linkage analysis	GridQTL	DAYS & STATUS	7	25	53	OMM5255	OMM1740	7	26086554	76522753	OMM5255	OMM1740
Fraslin et al., 2019	Animal Genetics	Les Aquaculteurs Bretons	SNPs	wssGBLUP	BLUPF90	DAYS	7					7	41610000		AX-89941977
Vallejo et al., 2022	Aquaculture	Troutlodge, Inc., YC 2015	SNPs	wssGBLUP								7	64274121	64984131	Affx-88954123	Affx-88908096				QTL 7.2
Palti et al., 2015	PlosOne	NCCCWA, YC 2009	RADs, STRs	QTL analysis & GWAS	GridQTL & GenAbel	DAYS	7	142		RM20090700643	RM20090701238	7	79581718	78907994	RM20090700643	RM20090701238
Quillet et al., 2014	Proceedings 10th WCGALP	doubled haploid F2 (RxS)	STRs, SNPs	QTL analysis	QTLMAP	STATUS	7	Na		Na		7			NA	NA
Vallejo et al., 2022	Aquaculture	Troutlodge, Inc., YC 2016	SNPs	wssGBLUP								8	6735927	7529204	Affx-88921537	Affx-88927298				QTL 8.1
Vallejo et al., 2022	Aquaculture	Troutlodge, Inc., YC 2016	SNPs	wssGBLUP								8	15660127	16651634	Affx-88918401	Affx-88918362				QTL 8.1
Liu et al., 2015	Frontiers in Genetics	NCCCWA, YC 2012	RADs	QTL analysis & GWAS	GridQTL & GenAbel	DAYS & STATUS	8	6		RTRAD89NT077533	RTRAD89NT148358	8	28673789			RTRAD89NT148358
Palti et al., 2015	PlosOne	NCCCWA, YC 2009	RADs, STRs	QTL analysis & GWAS	GridQTL & GenAbel	DAYS & STATUS	8	47		RM20090700197	OMM1295	8	47123210	47841720	RM20090700197	OMM1295	8	51625898
Vallejo et al., 2014	Marine Biotechnology	NCCCWA, YC 2005, 2007, 2009	STRs	Linkage analysis	GridQTL	DAYS & STATUS	8	45	58	OMM1295	BX870052a	8	47841193	70150488	OMM1295	BX870052a
Campbell et al., 2014	G3	Clear Springs Foods Inc.	RADs	GWAS	TASSEL	STATUS	8	Na		R46637		8	66832169	66832235	R46637
Vallejo et al., 2017	Frontiers in Genetics	Troutlodge, Inc., YC 2013	SNPs	BayesB	GENSEL	STATUS	8					8	76070399	76907400	Affx-88955037	Affx-88906927	8	81222406	82344590	QTL 8.2
Vallejo et al., 2022	Aquaculture	Troutlodge, Inc., YC 2015	SNPs	ssBMR-BayesB								8	76070399	76907400	Affx-88955037	Affx-88906927				QTL 8.2
Vallejo et al., 2022	Aquaculture	Troutlodge, Inc., YC 2015	SNPs	wssGBLUP								8	76653343	77402517	Affx-88959850	Affx-88952255				QTL 8.2
Palti et al., 2015	PlosOne	NCCCWA, YC 2009	RADs, STRs	QTL analysis & GWAS	GridQTL & GenAbel	DAYS & STATUS	8	88		RM20090701162	RM20090700382	8	82700594	60309401	RM20090701162	RM20090700382
Campbell et al., 2014	G3	Clear Springs Foods Inc.	RADs	GWAS	TASSEL	STATUS	9	Na		R53165		9	13262928	13262994	R53165
Fraslin et al., 2018	GSE	INRA doubled haploid F2 (RxS)	RADs	QTL analysis & GWAS								10	9388634	63547960						Omy10
Vallejo et al., 2017	Frontiers in Genetics	NCCCWA, YC 2005	SNPs	wssGBLUP	BLUPF90	STATUS	10					10	31536788	32517865	Affx-88925834	Affx-88904643	10	35553671	36620683
Campbell et al., 2014	G3	Clear Springs Foods Inc.	RADs	GWAS	TASSEL	STATUS	10	Na		R13883		10	40235878	40235944	R13883
Fraslin et al., 2019	Animal Genetics	Les Aquaculteurs Bretons	SNPs	wssGBLUP	BLUPF90	DAYS	10					10	49880000		AX-89966252
Palti et al., 2015	PlosOne	NCCCWA, YC 2009	RADs, STRs	QTL analysis & GWAS	GridQTL & GenAbel	DAYS & STATUS	11	122		RM20090702086	RM20090700457	11	12692677	11844951	RM20090702086	RM20090700457	11	15782741
Vallejo et al., 2014	Marine Biotechnology	NCCCWA, YC 2005, 2007, 2009	STRs	Linkage analysis	GridQTL	DAYS & STATUS	11	53	54	OMM3020	OMM1708	11	20343255	77910209	OMM3020	OMM1708
This study (FLAVOCONTROL)		Pop.B	SNPs	QTL analysis & GWAS		STATUS						11	40822753	41072577			11	43804699	44070523	Omy11_43.809
Vallejo et al., 2022	Aquaculture	Troutlodge, Inc., YC 2016	SNPs	wssGBLUP								11	51095728	51956812	Affx-88920426	Affx-88919591				QTL 11.1
Liu et al., 2015	Frontiers in Genetics	NCCCWA, YC 2012	RADs	QTL analysis & GWAS	GridQTL & GenAbel	DAYS	12	7		RTRAD89NT108132	RTRAD89NT076924	12	18722763	76000009	RTRAD89NT108132	RTRAD89NT076924				Sire HS family
This study (FLAVOCONTROL)		Pop.B	SNPs	QTL analysis & GWAS		STATUS						12	26973633	27358435			12	30649112	31030327	Omy12_31.030
Vallejo et al., 2014	Marine Biotechnology	NCCCWA, YC 2005, 2007, 2009	STRs	Linkage analysis	GridQTL	DAYS & STATUS	12	9	40	OMM1368	OMM5152	12	68915818	78021920	OMM1368	OMM5152
Palti et al., 2015	PlosOne	NCCCWA, YC 2009	RADs, STRs	QTL analysis & GWAS	GridQTL & GenAbel	DAYS & STATUS	12	109		OMM5152	RM20090702540	12	78020515		OMM5152	NA
Liu et al., 2015	Frontiers in Genetics	NCCCWA, YC 2012	RADs	QTL analysis & GWAS	GridQTL & GenAbel	DAYS & STATUS	13	132		RTRAD89NT116690	RTRAD89NT117459	13	3511353		NA	RTRAD89NT117459
Vallejo et al., 2014	Marine Biotechnology	NCCCWA, YC 2005, 2007, 2009	STRs	Linkage analysis	GridQTL	DAYS & STATUS	13	0	13	OMM1361a	OMM1330a	13	5594251		NA	OMM1330a				This QTL is ~6Mb far from QTL 13.1, both must be the same QTL
Vallejo et al., 2017	Frontiers in Genetics	NCCCWA, YC 2005	RAD-SNPs	wssGBLUP	BLUPF90	STATUS	13					13	11230016	11602309	BCWD10F05067	BCWD10F24318
Vallejo et al., 2014	Marine Biotechnology	NCCCWA, YC 2005, 2007, 2009	STRs	Linkage analysis	GridQTL	DAYS & STATUS	13	50	67	OMM1369	OMY1212UW	13	33625860	43402848	OMM1369	OMY1212UW				This QTL overlaps with QTL 13.2
Johnson et al., 2008	Marine Biotechnology	NCCCWA, YC 2005	STRs	Survival analysis; haplot analysis	SAS	DAYS	14	60.2	61.6	OMM3089	OMM1189	14	28602544	46336441	OMM3089	OMM1189
Johnson et al., 2008	Marine Biotechnology	NCCCWA, YC 2005	STRs	Survival analysis; single marker	SAS	DAYS	14	61.6		OMM3089		14	28602544	28603043	OMM3089
Johnson et al., 2008	Marine Biotechnology	NCCCWA, YC 2005	STRs	Survival analysis; single marker	SAS	DAYS	14	60.2		OMM1189		14	46336290		OMM1189
Palti et al., 2015	PlosOne	NCCCWA, YC 2009	RADs, STRs	QTL analysis & GWAS	GridQTL & GenAbel	DAYS	14	113		RM20090701114	OMM5174	14	63782238	79113240	RM20090701114	OMM5174	14	21852933
Fraslin et al., 2018	GSE	INRA doubled haploid F2 (RxS)	RADs	QTL analysis & GWAS								15	841533	48546904						Omy15
Vallejo et al., 2017	Frontiers in Genetics	NCCCWA, YC 2005	RAD-SNPs	wssGBLUP	BLUPF90	STATUS	15					15	38446758	39349228	BCWD10F00773	BCWD10F16617	15	42546643
Liu et al., 2015	Frontiers in Genetics	NCCCWA, YC 2012	RADs	QTL analysis & GWAS	GridQTL & GenAbel	DAYS & STATUS	15	Na		RTRAD89NT139370		15			NA					This RAD marker is in scaffold not yet placed into CHR
Liu et al., 2015	Frontiers in Genetics	NCCCWA, YC 2012	RADs	QTL analysis & GWAS	GridQTL & GenAbel	STATUS	16	121		RTRAD89NT079624	RTRAD89NT086508	16	14307582	10670683	RTRAD89NT079624	RTRAD89NT086508	16	17118617
Campbell et al., 2014	G3	Clear Springs Foods Inc.	RADs	GWAS	TASSEL	STATUS	16	Na		R46743		16	56362916	56362982	R46743
Campbell et al., 2014	G3	Clear Springs Foods Inc.	RADs	GWAS	TASSEL	STATUS	16	Na		R45138		16	56428269	56428335	R45138
﻿Mathiessen et al., 2023	Aquac Reports	AquaGen	SNPs	GWAS		STATUS						17
Fraslin et al., 2018	GSE	INRA doubled haploid F2 (RxS)	RADs	QTL analysis & GWAS								17	9634994	71677047						Omy17Omy3
Fraslin et al., 2018	GSE	INRA doubled haploid F2 (RxS)	RADs	QTL analysis & GWAS								17	9634994	28102272						Omy17Omy29
Fraslin et al., 2018	GSE	INRA doubled haploid F2 (RxS)	RADs	QTL analysis & GWAS								17	14182725	38961422						Omy17Omy25a
This study (FLAVOCONTROL)		Pop. A + B	SNPs	QTL analysis & GWAS		STATUS						17	17567258	18058046			17	32123483	32626696	Omy17_32.578
This study (FLAVOCONTROL)		Pop.A	SNPs	QTL analysis & GWAS		STATUS						17	18004602	18058046			17	32575001	32626696	Omy17_32.578
Johnson et al., 2008	Marine Biotechnology	NCCCWA, YC 2005	STRs	Survival analysis; single marker	SAS	DAYS	17	58.6		OMM3026		17	49643686		OMM3026
Fraslin et al., 2019	Animal Genetics	Les Aquaculteurs Bretons	SNPs	wssGBLUP	BLUPF90	DAYS	17					17	59330000		AX-89938324
Campbell et al., 2014	G3	Clear Springs Foods Inc.	RADs	GWAS	TASSEL	STATUS	17	Na		R46597		17	68544352	68544418	R46597
Campbell et al., 2014	G3	Clear Springs Foods Inc.	RADs	GWAS	TASSEL	STATUS	17	Na		R26956		17	75865272	75865338	R26956
Quillet et al., 2014	Proceedings 10th WCGALP	doubled haploid F2 (RxS)	STRs, SNPs	QTL analysis	QTLMAP	STATUS	17	Na		Na		17			NA
Wiens et al., 2013	PlosOne	NCCCWA, YC 2007, 2008	STRs	Linkage analysis	GridQTL	DAYS & STATUS	19	3		OMM1125	BX873975a	19	3000000		NA	NA				In scaffold not yet placed into CHR
Vallejo et al., 2014	Aquaculture	NCCCWA, YC 2012	STRs	Linkage analysis	GridQTL & SOLAR	DAYS & STATUS	19	12	13	OMY120INRAb	OMM1134a	19	3997315	9301213	OMY120INRAb	OMM1134a
Wiens et al., 2013	PlosOne	NCCCWA, YC 2007, 2008	STRs	Linkage analysis	GridQTL	Disease lesion	19	5		BX873975a	OMM1124a	19	5000000		NA	NA				In scaffold not yet placed into CHR
Liu et al., 2015	Frontiers in Genetics	NCCCWA, YC 2012	RADs	QTL analysis & GWAS	GridQTL & GenAbel	DAYS & STATUS	19	22		RTRAD89NT135689	RTRAD89NT125108	19	5520177	6297969	RTRAD89NT135689	RTRAD89NT125108				Dam HS family
Vallejo et al., 2014	Marine Biotechnology	NCCCWA, YC 2005, 2007, 2009	STRs	Linkage analysis	GridQTL	STATUS	19	17		OMM1657b	OMM1412b	19	7032964	8452107	OMM1657b	OMM1412b
Vallejo et al., 2014	Marine Biotechnology	NCCCWA, YC 2005, 2007, 2009	STRs	Linkage analysis	GridQTL	DAYS & STATUS	19	69	75	OMM1134a	OMM1440	19	9300746	11115536	OMM1134a	OMM1440
Vallejo et al., 2022	Aquaculture	Troutlodge, Inc., YC 2016	SNPs	ssBMR-BayesB								19	26120129	26933022	Affx-88913180	Affx-88910643				QTL 19.1
Vallejo et al., 2022	Aquaculture	Troutlodge, Inc., YC 2016	SNPs	wssGBLUP								19	26120129	26933022	Affx-88913180	Affx-88910643				QTL 19.1
Vallejo et al., 2022	Aquaculture	Troutlodge, Inc., YC 2015	SNPs	wssGBLUP								19	54384780	55351545	Affx-88917202	Affx-88920174				QTL 19.2
Vallejo et al., 2022	Aquaculture	Troutlodge, Inc., YC 2016	SNPs	ssBMR-BayesB								20	17057878	17792663	Affx-88934418	Affx-88935291				QTL 20.1
Liu et al., 2015	Frontiers in Genetics	NCCCWA, YC 2012	RADs	QTL analysis & GWAS	GridQTL & GenAbel	DAYS	20	58		RTRAD89NT138373	RTRAD89NT137053	20	20386923	22848027	RTRAD89NT138373	RTRAD89NT137053
Fraslin et al., 2018	GSE	INRA doubled haploid F2 (RxS)	RADs	QTL analysis & GWAS								20	24880342	32019947						Omy20
Vallejo et al., 2014	Marine Biotechnology	NCCCWA, YC 2005, 2007, 2009	STRs	Linkage analysis	GridQTL	DAYS & STATUS	20	2		OMM5044	OMM1076	20	35265401	30997186	OMM5044	OMM1076
Fraslin et al., 2018	GSE	INRA doubled haploid F2 (RxS)	RADs	QTL analysis & GWAS								21	30373476	49245179						Omy21
Fraslin et al., 2018	GSE	INRA doubled haploid F2 (RxS)	RADs	QTL analysis & GWAS								21	30373476	49245179						Omy21
Fraslin et al., 2018	GSE	INRA doubled haploid F2 (RxS)	RADs	QTL analysis & GWAS								21	30989990	49245179						Omy21Omy3
Vallejo et al., 2014	Marine Biotechnology	NCCCWA, YC 2005, 2007, 2009	STRs	Linkage analysis	GridQTL	DAYS & STATUS	22	5		CA361411	BX913059	22	12067641	23649497	CA361411	BX913059
Palti et al., 2015	PlosOne	NCCCWA, YC 2009	RADs, STRs	QTL analysis & GWAS	GridQTL & GenAbel	STATUS	8	9		RM20090701322	RM20090700210	22	27256052		RM20090701322	NA
Liu et al., 2015	Frontiers in Genetics	NCCCWA, YC 2012	RADs	QTL analysis & GWAS	GridQTL & GenAbel	DAYS & STATUS	22	Na		RTRAD89NT127892		22	33820189		RTRAD89NT127892		22	34540120		This QTL is ~8Mb far from QTL 22.1, both must be the same QTL
Vallejo et al., 2022	Aquaculture	Troutlodge, Inc., YC 2016	SNPs	ssBMR-BayesB								23	10072985	10919761	Affx-88933097	Affx-88923588				QTL 23.1
Vallejo et al., 2014	Marine Biotechnology	NCCCWA, YC 2005, 2007, 2009	STRs	Linkage analysis	GridQTL	DAYS & STATUS	24	11	29	OMM1093	OMM1288	24	7754786	35306305	OMM1093	OMM1288
Fraslin et al., 2018	GSE	INRA doubled haploid F2 (RxS)	RADs	QTL analysis & GWAS								24	8827911	39632487						Omy24Omy2
This study (FLAVOCONTROL)		Pop.B	SNPs	QTL analysis & GWAS		STATUS						24	21579459	21654528			24	22557854	22627181	Omy24_22.618
Fraslin et al., 2018	GSE	INRA doubled haploid F2 (RxS)	RADs	QTL analysis & GWAS								25	4179239	28574405						Omy25aOmy3
Fraslin et al., 2018	GSE	INRA doubled haploid F2 (RxS)	RADs	QTL analysis & GWAS								25	4179239	26054799						Omy25a
Vallejo et al., 2022	Aquaculture	Troutlodge, Inc., YC 2015	SNPs	wssGBLUP								25	17218457	18192885	Affx-88934652	Affx-88956678				QTL 25.1
Vallejo et al., 2017	Frontiers in Genetics	NCCCWA, YC 2005	RAD-SNPs	wssGBLUP	BLUPF90	STATUS	25					25	17496495	18444865	BCWD10F06483	BCWD10F14339
Vallejo et al., 2022	Aquaculture	Troutlodge, Inc., YC 2015	SNPs	ssBMR-BayesB								25	18192885	18917885	Affx-88956678	Affx-88957137				QTL 25.1
Fraslin et al., 2018	GSE	INRA doubled haploid F2 (RxS)	RADs	QTL analysis & GWAS								25	18293616	23997277						Omy25aOmy3
Vallejo et al., 2022	Aquaculture	Troutlodge, Inc., YC 2015	SNPs	wssGBLUP								25	19553268	20412830	Affx-88927676	Affx-88910763				QTL 25.1
Vallejo et al., 2022	Aquaculture	Troutlodge, Inc., YC 2016	SNPs	ssBMR-BayesB								25	20028165	20972512	Affx-88924886	Affx-88929547				QTL 25.1
Vallejo et al., 2022	Aquaculture	Troutlodge, Inc., YC 2015	SNPs	wssGBLUP								25	20751780	21673784	Affx-88924886	Affx-88929795				QTL 25.1
This study (FLAVOCONTROL)		Pop. A + B	SNPs	QTL analysis & GWAS		STATUS						25	20825104	21165839			31	24852072	25233141	Omy31_25.233
Mathiesen et al. (2023)	Aquac Reports	AquaGen, AquaSearch	SNPs	GWAS		STATUS						25	20868713				31	24889752
Vallejo et al., 2022	Aquaculture	Troutlodge, Inc., YC 2016	SNPs	wssGBLUP								25	20930495	21771565	Affx-88939247	Affx-88933656				QTL 25.1
Liu et al., 2015	Frontiers in Genetics	NCCCWA, YC 2012	RADs	QTL analysis & GWAS	GridQTL & GenAbel	STATUS	25	96		RTRAD89NT088553	RTRAD89NT114044	25	20981355	28634097	RTRAD89NT088553	RTRAD89NT114044	31	25019498		Dam HS family
Vallejo et al., 2017	Frontiers in Genetics	Troutlodge, Inc., YC 2013	SNPs	BayesB	GENSEL	STATUS	25					25	21006787	21805909	Affx-88924154	Affx-88936445	31	25065565	25883294
Vallejo et al., 2022	Aquaculture	Troutlodge, Inc., YC 2015	SNPs	ssBMR-BayesB								25	21019355	21805909	Affx-88939492	Affx-88936445				QTL 25.1
Vallejo et al., 2022	Aquaculture	Troutlodge, Inc., YC 2015	SNPs	wssGBLUP								25	23082773	24075917	Affx-88936891	Affx-88932643				QTL 25.1
Vallejo et al., 2022	Aquaculture	Troutlodge, Inc., YC 2015	SNPs	ssBMR-BayesB								25	24075917	24868628	Affx-88932643	Affx-88951303				QTL 25.1
Vallejo et al., 2022	Aquaculture	Troutlodge, Inc., YC 2015	SNPs	wssGBLUP								25	24638051	25582460	Affx-88947295	Affx-88918545				QTL 25.1
Vallejo et al., 2017	Frontiers in Genetics	NCCCWA, YC 2005	SNPs	wssGBLUP	BLUPF90	STATUS	25					25	28240466	29219522	Affx-88919589	Affx-88945013	31	33160109	34146530
Palti et al., 2015	PlosOne	NCCCWA, YC 2009	RADs, STRs	QTL analysis & GWAS	GridQTL & GenAbel	DAYS & STATUS	25	59		OMM1532	RM20090706025	25	50803067	54147313	OMM1532	RM20090706025	25		15234774
Vallejo et al., 2014	Marine Biotechnology	NCCCWA, YC 2005, 2007, 2009	STRs	Linkage analysis	GridQTL	DAYS & STATUS	25	40	45	OMM1532	OMM3144	25	50803067	35437412	OMM1532	OMM3144
Campbell et al., 2014	G3	Clear Springs Foods Inc.	RADs	GWAS	TASSEL	STATUS	25	Na		R08795		25	56197078	56197144	R08795
Vallejo et al., 2022	Aquaculture	Troutlodge, Inc., YC 2016	SNPs	ssBMR-BayesB								25	66242140	66803508	Affx-88959998	Affx-88928024				QTL 25.2
Vallejo et al., 2022	Aquaculture	Troutlodge, Inc., YC 2016	SNPs	wssGBLUP								25	66242140	66803508	Affx-88959998	Affx-88928024				QTL 25.2
Liu et al., 2015	Frontiers in Genetics	NCCCWA, YC 2012	RADs	QTL analysis & GWAS	GridQTL & GenAbel	DAYS & STATUS	25	65		RTRAD89NT085710	RTRAD89NT120059	25	69822700	77035957	RTRAD89NT085710	RTRAD89NT120059	25		39232093
Fraslin et al., 2018	GSE	INRA doubled haploid F2 (RxS)	RADs	QTL analysis & GWAS								26	3286969	19567231						Omy26
Fraslin et al., 2018	GSE	INRA doubled haploid F2 (RxS)	RADs	QTL analysis & GWAS								26	14624621	3286969						Omy26Omy29
Liu et al., 2015	Frontiers in Genetics	NCCCWA, YC 2012	RADs	QTL analysis & GWAS	GridQTL & GenAbel		26	20		RTRAD89NT102658	RTRAD89NT096484	26	20592222	25832294	RTRAD89NT102658	RTRAD89NT096484
Vallejo et al., 2022	Aquaculture	Troutlodge, Inc., YC 2016	SNPs	wssGBLUP								26	26516390	27037551	Affx-88953060	Affx-88931037				QTL 26.1
Liu et al., 2015	Frontiers in Genetics	NCCCWA, YC 2012	RADs	QTL analysis & GWAS	GridQTL & GenAbel	DAYS & STATUS	26	Na		RTRAD89NT142090		26	26517076		RTRAD89NT142090
Fraslin et al., 2018	GSE	INRA doubled haploid F2 (RxS)	RADs	QTL analysis & GWAS								27	6900755	29807017						Omy27
Liu et al., 2015	Frontiers in Genetics	NCCCWA, YC 2012	RADs	QTL analysis & GWAS	GridQTL & GenAbel	STATUS	28	53		RTRAD89NT093730	RTRAD89NT148989	28	25676449	24907679	RTRAD89NT093730	RTRAD89NT148989	28	26000685		Dam HS family
Liu et al., 2015	Frontiers in Genetics	NCCCWA, YC 2012	RADs	QTL analysis & GWAS	GridQTL & GenAbel	DAYS & STATUS	28	80		RTRAD89NT083376	RTRAD89NT128385	28	35537693	39583042	RTRAD89NT083376	RTRAD89NT128385	28	36359644
Fraslin et al., 2018	GSE	INRA doubled haploid F2 (RxS)	RADs	QTL analysis & GWAS								29	9452397	37322480						Omy29.2Omy3
Fraslin et al., 2018	GSE	INRA doubled haploid F2 (RxS)	RADs	QTL analysis & GWAS								29	12934703	37322574						Omy29
Fraslin et al., 2018	GSE	INRA doubled haploid F2 (RxS)	RADs	QTL analysis & GWAS								29	17654434	37322480						Omy29
Fraslin et al., 2018	GSE	INRA doubled haploid F2 (RxS)	RADs	QTL analysis & GWAS								29	17825675	37322480						Omy29
This study (FLAVOCONTROL)		Pop.A	SNPs	QTL analysis & GWAS		STATUS						29	31700840	33154261			29	32952883	34352133	Omy29_33.441
This study (FLAVOCONTROL)		Pop. A + B	SNPs	QTL analysis & GWAS		STATUS						29	32305707	33249259			29	33434218	34453517	Omy29_33.441
Footnotes:
This table is adapted from supplemental table S5 of Vallejo et al 2022.
		Pop.B
