# Supplementary material for: Remarquable heterogeneity in the genetic architecture of resistance to a key bacterial pathogen in commercial populations of rainbow trout
Source: Research Square preprint supplement (doi:10.21203/rs.3.rs-6591460/v1), 2025-07-15
Supplement: Supplementary file 4 [file 8da44e11295b8b080e7cfaa6.xlsx]

## Sheet: Read_me
Sheets
QTLs_in_4_GWAS		Location and effects of the QTLs detected in at least one seed for BCWD resistance assessed as the survival status of the fish in the two French rainbow trout populations in the 4 GWAS.
QTLs_in_10_seeds		Occurrence of the QTLs across the 10 runs of each GWAS using different random seeds.
Genes_in_11_QTLs		List of all the genes located in the 11 QTL regions detected with >50% occurrence.
Column names
GWAS		Four GWAS were performed using various phenotypic datasets, as follows: the survival status at the end of the challenge (29 dpi) for each population A and B (GWAS ‘Pop. A’ and ‘Pop. B’), or with the two of them combined (GWAS ‘Comb. A+B’); the survival status at 10 dpi for population A (GWAS ‘Pop. A 10 dpi’).
QTL_ID		Names indicate the genomic position of the more frequent SNP pic (Mb) among the 10 runs of each GWAS using different random seeds. For QTLs identified in both ‘Pop. A’ and ‘Comb. A+B’ analyses with different SNP pics, the name was set according to GWAS ‘Pop. A’ results.
Occurrence (%)		QTL detection occurrence in percent for the 10 runs of each GWAS using different random seeds. QTLs detected at >50% occurrence are in bold.
Chr.		Name of the chromosome.
peak SNP_ID		Name of the peak SNP.
Allele		Reference (A) and alternative (B) allele at a given SNP.
Position (Mb)		Position of the peak SNP in the chromosome expressed in Mb.
logBF		Logarithm transformation of the Bayes factor value of each peak SNP to facilitate the determination of thresholds to declare QTL.
MAF		Minor allele Frequency.
QTL start (Mb)		Start position (expressed as Mb) of the QTL is the min value resulting from the 10 runs of each GWAS using different random seeds.
QTL end (Mb)		End position (expressed as Mb) of the QTL is the max value resulting from the 10 runs of each GWAS using different random seeds.
Number of fish		Number of genotyped and phenotyped fish for a given genotype (i.e. A/A, A/B and B/B) at a given peak SNP.
Survival (%)		Survival (expressed as %) for each genotype (i.e. A/A, A/B and B/B) at a given peak SNP.
Total number of fish		Total number of fish included in each GWAS.
Span (Mb)		Span of each QTL (expressed as Mb).
Seed		Identification of each of the 10 seeds used for the 4 GWAS.
QTL position (min-max)		Start and end positions of each QTL are min and max values resulting from the 10 runs of each GWAS using different random seeds.
Ensembl Gene ID		Unique identifier assigned to a gene by the Ensembl database.
Start (bp)		Starting base pair position of the gene on the chromosome.
End (bp)		Ending base pair position of the gene on the chromosome.
Strand		Indicates the DNA strand on which the gene is located. It can either be the forward strand (denoted by "+") or the reverse strand (denoted by "-").
Gene type		Describes the functional category of the gene. Examples include "protein-coding" (genes that encode proteins) or "lncRNA" (long non-coding RNA).
HGNC		Standardized and approved symbol (or name) for the gene, as assigned by the HUGO Gene Nomenclature Committee.
Gene description		Description of the gene's function, role, or characteristics. This can include information about its involvement in biological processes.

## Sheet: Table S2_QTLs_in_4_GWAS
Table S2. Location and effects of the QTLs detected for BCWD resistance assessed as the survival status of the fish in the two French rainbow trout populations in the 4 GWAS.
GWAS	QTL_ID	Occurrence (%)	Chr.	peak SNP_ID	Allele		Position (Mb)	logBF	MAF	QTL start (Mb)	QTL end (Mb)	Number of fish			Survival (%)			Total number of fish
					A	B						A/A	A/B	B/B	A/A	A/B	B/B
Pop. A	Omy3_54.440	100	3	Affx-1237707186	A	C	54.3874	18.68 - 19.62	0.45	54.2707	54.862	344	584	220	37.7907	48.2877	77.2727	1148
			3	Affx-1237719653	C	T	54.4404		0.45			220	584	344	77.2727	48.2877	37.7907	1148
	Omy6_78.513	20	6	Affx-1237812266	C	T	78.514	15.09 - 15.12	0.09	78.514	79.2552	27	154	967	33.3333	35.7143	53.5677	1148
	Omy17_32.578	100	17	Affx-1237476495	C	T	32.5783	15.16 - 16.35	0.35	32.575	32.6267	118	568	462	66.1017	57.9225	37.8788	1148
	Omy29_33.441	90	29	Affx-88914235	A	G	33.4342	15.05 - 15.57	0.45	32.9529	34.4055	348	571	229	66.3793	46.4098	37.5546	1148
			29	Affx-1237700882	A	C	33.4415		0.45			346	572	230	66.474	46.5035	37.3913	1148
Pop. B	Omy1_19.133	30	1	Affx-1237311001	T	C	19.133	17.99 - 19.03	0.49	18.8733	19.4745	229	556	253	81.2227	65.8273	74.3083	1038
			1	Affx-277344840	A	G	19.3505		0.5			257	528	253	73.1518	68.75	74.7036	1038
			1	Affx-1237324748	C	T	19.3597		0.48			229	536	273	75.1092	69.0299	72.5275	1038
	Omy1_24.646	100	1	Affx-88955346	A	C	24.6461	≥ 22.07	0.11	24.5723	25.3825	827	194	17	68.3192	81.4433	100	1038
			1	Affx-1237315044	A	G	24.6648		0.15			760	243	35	66.9737	81.4815	94.2857	1038
			1	Affx-1237318664	T	C	24.8214		0.14			764	252	22	72.2513	67.8571	77.2727	1038
	Omy1_52.962	10	1	Affx-1237307662	G	T	52.9627	15.18	0.48	52.9627	53.0511	282	515	241	72.3404	71.4563	69.7095	1038
	Omy1_58.069	70	1	Affx-1237303793	A	G	57.3584	15.71 - 20.46	0.46	57.2934	58.0696	300	526	212	69.3333	72.2433	71.6981	1038
			1	Affx-1237303799	G	A	57.3848		0.46			212	526	300	71.6981	72.2433	69.3333	1038
			1	Affx-1237304154	A	G	57.5238		0.49			239	532	267	68.6192	71.6165	73.0337	1038
			1	Affx-1237304167	G	A	58.0696		0.49			267	532	239	73.0337	71.6165	68.6192	1038
	Omy1_59.302	80	1	Affx-1237313868	A	G	58.9913	15.32 - 29.06	0.49	58.809	59.4116	240	531	267	68.75	71.5631	73.0337	1038
			1	Affx-1237313875	A	C	58.9972		0.49			240	531	267	68.75	71.5631	73.0337	1038
			1	Affx-1237317094	A	G	59.3027		0.44			308	543	187	67.5325	70.1657	80.7487	1038
			1	Affx-88929515	T	C	59.3119		0.5			242	558	238	67.7686	68.4588	81.5126	1038
	Omy2_52.706	40	2	Affx-1237553383	T	G	52.688	15.09 - 26.29	0.42	52.314	53.1968	328	545	165	71.6463	68.6239	79.3939	1038
			2	Affx-1237553390	G	A	52.7063		0.45			293	547	198	72.6962	68.0073	78.2828	1038
	Omy4_20.731	50	4	Affx-1237739165	G	A	20.7318	≥ 30.00	0.27	20.7318	20.785	66	437	535	63.6364	62.7002	79.2523	1038
	Omy4_33.744	10	4	Affx-1237748135	T	G	33.7447	18.58	0.38	33.1965	34.0688	394	506	138	63.7056	73.3202	85.5072	1038
	Omy6_64.287	20	6	Affx-88910232	C	A	64.2878	20.60 - 21.12	0.48	64.0678	64.3583	215	559	264	68.3721	67.6208	81.4394	1038
	Omy11_42.427	10	11	Affx-1237374955	T	C	42.4274	17.22	0.06	42.396	42.4992	919	116	3	71.1643	72.4138	66.6667	1038
	Omy11_43.242	10	11	Affx-277312168	A	G	43.2426	18.63	0.44	43.2291	43.2426	331	499	208	70.3927	70.1403	75.4808	1038
	Omy11_43.809	60	11	Affx-1237377317	T	C	43.8092	19.22 - 19.88	0.42	43.8047	44.0705	333	540	165	69.97	65.5556	92.7273	1038
			11	Affx-88956542	A	G	43.8188		0.42			333	540	165	69.97	65.5556	92.7273	1038
			11	Affx-1237377318	C	A	43.822		0.42			165	540	333	92.7273	65.5556	69.97	1038
	Omy11_45.227	20	11	Affx-1237367898	A	G	45.2276	16.68 - 19.74	0.44	45.2276	45.4928	328	500	210	71.0366	69.6	75.7143	1038
			11	Affx-1237371251	C	A	45.4928		0.4			167	489	382	72.4551	71.3701	70.6806	1038
	Omy12_30.649	60	12	Affx-88937839	G	T	30.6491	17.87 - 24.52	0.44	30.6491	31.0303	315	533	190	67.9365	69.7936	81.0526	1038
			12	Affx-88910175	T	G	31.0303		0.47			210	566	262	73.8095	66.7845	79.0076	1038
	Omy13_50.122	20	13	Affx-277330759	C	A	50.1228	15.20 - 18.26	0.45	49.61	50.1364	204	525	309	83.3333	71.619	62.7832	1038
	Omy14_10.847	10	14	Affx-88906645	A	C	10.8476	19.97	0.34	10.7461	11.0675	424	518	96	72.1698	66.6023	92.7083	1038
	Omy14_11.724	10	14	Affx-1248448483	C	T	11.7249	17.28	0.36	11.3546	11.7997	126	488	424	69.8413	70.4918	72.6415	1038
	Omy15_40.286	20	15	Affx-1237451324	C	A	40.2025	19.87 - 21.24	0.34	40.1682	40.4519	120	469	449	72.5	68.8699	73.4967	1038
			15	Affx-88935485	T	C	40.2863		0.34			448	470	120	73.4375	68.9362	72.5	1038
	Omy16_39.816	10	16	Affx-1237454052	A	C	39.8163	16	0.48	39.8163	40.4903	261	557	220	65.1341	70.1975	81.3636	1038
	Omy16_40.918	30	16	Affx-1248476774	G	A	40.9184	16.47 - 16.82	0.46	40.8393	42.1085	202	548	288	77.7228	73.3577	62.8472	1038
			16	Affx-1237466445	A	G	41.6132		0.08			878	150	10	74.0319	57.3333	40	1038
			16	Affx-1237466451	G	A	41.6253		0.08			10	150	878	40	57.3333	74.0319	1038
	Omy17_32.578	10	17	Affx-1248486801	G	A	33.3162	15.19	0.13	32.8833	33.5691	17	228	793	76.4706	83.7719	67.5914	1038
	Omy21_34.201	10	21	Affx-1237577611	T	C	34.2019	18.43	0.34	34.137	34.2019	441	479	118	69.3878	71.19	78.8136	1038
	Omy21_35.054	10	21	Affx-1237589351	A	G	35.0541	15.56	0.34	34.2627	35.0541	443	478	117	69.0745	71.5481	78.6325	1038
	Omy21_35.683	10	21	Affx-1237589364	T	C	35.6834	17.43	0.36	35.5093	35.9515	416	504	118	73.3173	68.0556	77.9661	1038
	Omy24_21.910	40	24	Affx-1237623098	A	G	21.9102	15.53 - 20.72	0.08	21.8923	21.9471	886	147	5	71.4447	70.7483	60	1038
			24	Affx-1248569765	T	C	21.9471		0.07			903	131	4	71.5393	70.229	50	1038
	Omy24_22.267	60	24	Affx-1248569909	A	G	22.5664	16.95 - 20.36	0.07	22.2672	22.6272	901	133	4	71.4761	70.6767	50	1038
			24	Affx-1248569917	G	A	22.5974		0.07			4	133	901	50	70.6767	71.4761	1038
			24	Affx-1248569920	C	A	22.6183		0.07			4	135	899	50	71.1111	71.4127	1038
			24	Affx-1237626334	T	C	22.6272		0.07			901	133	4	71.4761	70.6767	50	1038
Comb. A+B	Omy3_54.440	100	3	Affx-1237712934	G	T	54.2707	18.25 - 20.11	0.43	54.0539	54.6858	803	876	507	74.4707	57.3059	43.787	2186
			3	Affx-1237719653	C	T	54.4404		0.46			648	1062	476	73.6111	59.4162	44.958	2186
			3	Affx-1237722563	G	T	54.5918		0.5			554	1084	548	74.1877	60.0554	47.4453	2186
	Omy3_56.295	10	3	Affx-1248254270	T	C	56.2959	15.19	0.13	56.195	56.8717	1660	481	45	57.7711	68.3992	75.5556	2186
	Omy3_67.363	30	3	Affx-1237718965	T	C	67.3632	15.27 - 16.53	0.23	67.1778	67.3772	1320	726	140	54.6212	67.6309	78.5714	2186
			3	Affx-1237718971	G	A	67.3772		0.26			204	745	1237	80.8824	65.906	53.8399	2186
	Omy4_20.731	20	4	Affx-1237739165	G	A	20.7318	19.34 - 25.96	0.35	20.7318	20.785	268	989	929	52.9851	54.9039	68.5684	2186
	Omy7_38.275	10	7	Affx-1237817932	T	C	38.2753	18.12	0.34	38.0847	38.3049	950	971	265	59.1579	60.5561	64.9057	2186
	Omy15_40.286	40	15	Affx-1237452604	T	C	40.2742	16.28 - 21.46	0.44	40.1682	40.4519	784	894	508	55.2296	58.7248	71.6535	2186
			15	Affx-88935485	C	T	40.2863		0.44			508	895	783	71.6535	58.7709	55.1724	2186
			15	Affx-1237452615	A	G	40.3431		0.43			783	932	471	55.1724	56.5451	77.0701	2186
			15	Affx-1237452619	A	G	40.4519		0.43			785	893	508	55.2866	58.6786	71.6535	2186
	Omy17_32.578	100	17	Affx-1237476538	A	C	32.6177	16.10 - 18.08	0.43	32.1235	32.6267	718	1077	391	47.3538	65.0882	71.867	2186
			17	Affx-1237476542	G	A	32.6257		0.43			391	1077	718	71.867	65.0882	47.3538	2186
			17	Affx-1237476543	G	T	32.626		0.43			391	1077	718	71.867	65.0882	47.3538	2186
			17	Affx-1237476544	A	G	32.6267		0.43			718	1077	391	47.3538	65.0882	71.867	2186
	Omy24_22.267	20	24	Affx-1237622587	G	A	22.2672	15.76 - 17.88	0.1	22.1843	22.5974	21	417	1748	52.381	50.3597	62.9863	2186
	Omy29_33.441	100	29	Affx-1237691146	T	G	34.1366	17.91 - 20.14	0.49	33.4342	34.4535	565	1089	532	72.9204	58.4022	51.5038	2186
			29	Affx-1237691151	G	A	34.1505		0.49			532	1089	565	51.5038	58.4022	72.9204	2186
	Omy31_23.528	10	31	Affx-1237647599	A	C	23.5285	15.16	0.26	22.5893	23.7235	1253	727	206	68.3958	53.7827	35.9223	2186
	Omy31_25.233	100	31	Affx-1237631285	G	A	25.2331	16.28 - 19.42	0.5	24.8521	25.2331	563	1056	567	69.8046	61.4583	49.3827	2186
Pop. A (10 dpi)	Omy3_53.505	100	3	Affx-1237709824	C	A	53.505	17.26 - 18.50	0.45	53.466	53.9867	203	613	332	88.1773	79.9347	67.7711	1148
	Omy24_34.633	40	24	Affx-1248572025	C	A	34.6338	15.47 - 15.74	0.38	34.502	35.028	156	571	421	89.1026	80.2102	70.5463	1148

## Sheet: Table S3_QTLs_in_10_seeds
Table S3. Occurrence of the QTLs across the 10 runs of each GWAS using different random seeds.
QTL					Seed
GWAS	QTL_ID	Occurrence (%)	Chr.	Span (Mb)	1	2	3	4	5	6	7	8	9	10
Pop. A	Omy3_54.440	100	3	54.270712-54.862004	x	x	x	x	x	x	x	x	x	x
	Omy6_78.513	20	6	78.513989-79.255159		x							x
	Omy17_32.578	100	17	32.575001-32.626696	x	x	x	x	x	x	x	x	x	x
	Omy29_33.441	90	29	32.952883-34.405456	x	x	x	x	x	x	x	x	x
Pop. B	Omy1_19.133	30	1	18.873332-19.474477		x		x	x
	Omy1_24.646	100	1	24.572341-25.3825	x	x	x	x	x	x	x	x	x	x
	Omy1_52.962	10	1	52.96273-53.05107										x
	Omy1_58.069	70	1	57.293434-58.069571	x		x	x		x		x	x	x
	Omy1_59.302	80	1	58.80904-59.411582	x	x	x	x			x	x	x	x
	Omy2_52.706	40	2	52.313976-53.196777			x	x		x	x
	Omy4_20.731	50	4	20.731842-20.784999	x	x				x		x		x
	Omy4_33.744	10	4	33.196462-34.068813		x
	Omy6_64.287	20	6	64.067822-64.358307						x	x
	Omy11_42.427	10	11	42.395978-42.499168									x
	Omy11_43.242	10	11	43.229061-43.242638				x
	Omy11_43.809	60	11	43.804699-44.070523		x		x	x		x		x	x
	Omy11_45.227	20	11	45.227568-45.492807		x								x
	Omy12_30.649	60	12	30.649112-31.030327	x	x	x	x				x	x
	Omy13_50.122	20	13	49.610028-50.136424					x				x
	Omy14_10.847	10	14	10.746138-11.067456										x
	Omy14_11.724	10	14	11.354555-11.799661										x
	Omy15_40.286	20	15	40.168235-40.451935				x	x
	Omy16_39.816	10	16	39.81628-40.490297				x
	Omy16_40.918	30	16	40.839304-42.108526		x					x			x
	Omy17_32.578	10	17	32.883279-33.569063						x
	Omy21_34.201	10	21	34.13704-34.201878	x
	Omy21_35.054	10	21	34.262729-35.054053			x
	Omy21_35.683	10	21	35.509338-35.951467	x
	Omy24_21.910	40	24	21.892339-21.947067	x			x		x				x
	Omy24_22.267	60	24	22.267241-22.627181	x		x	x		x	x			x
Comb. A+B	Omy3_54.440	100	3	54.053907-54.685772	x	x	x	x	x	x	x	x	x	x
	Omy3_56.295	10	3	56.195002-56.871743		x
	Omy3_67.363	30	3	67.177832-67.377162		x							x	x
	Omy4_20.731	20	4	20.731842-20.784999		x				x
	Omy7_38.275	10	7	38.084711-38.304909									x
	Omy15_40.286	40	15	40.168235-40.451935		x		x					x	x
	Omy17_32.578	100	17	32.123483-32.626696	x	x	x	x	x	x	x	x	x	x
	Omy24_22.267	20	24	22.184276-22.59737	x							x
	Omy29_33.441	100	29	33.434218-34.453517	x	x	x	x	x	x	x	x	x	x
	Omy31_23.528	10	31	22.589307-23.723505		x
	Omy31_25.233	100	31	24.852072-25.233141	x	x	x	x	x	x	x	x	x	x
Pop. A (10 dpi)	Omy3_53.505	100	3	53.465989-53.98674	x	x	x	x	x	x	x	x	x	x
	Omy24_34.633	40	24	34.502015-35.028045		x		x		x			x
